# Supplementary material
Source: PubMed Central journal article supplement (PMC6456415)
Supplement: NIHMS1520972-supplement-1.pdf [file NIHMS1520972-supplement-1.pdf]

## **Supplemental Information**

### **Microbial colonization activates an immune fight-and-flight response via neuroendocrine signaling**

Jogender Singh<sup>1</sup> and Alejandro Aballay<sup>1,2,\*</sup>

<sup>1</sup>Department of Molecular Microbiology & Immunology, Oregon Health & Science University,  
Portland, OR 97239, USA

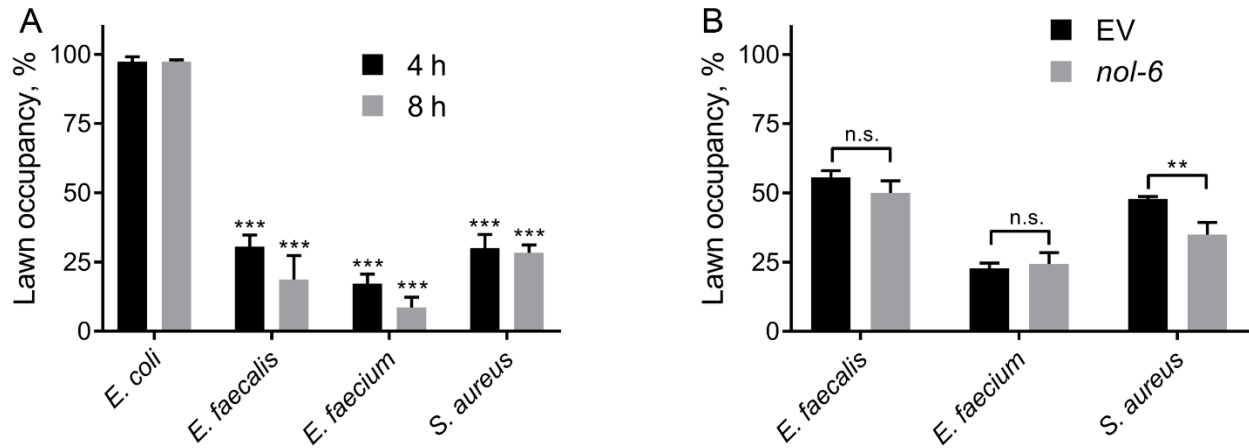

**Figure S1. Microbial Pathogens Elicit Different Patterns of Avoidance in *C. elegans*, Related to Figures 1 and 2**

(A) Occupancy of different bacterial lawns by wild-type N2 *C. elegans* at 4 hours and 8 hours after transfer to the lawns. p-values for *E. faecalis*, *E. faecium* and *S. aureus* are relative to *E. coli* for the corresponding time points. \*\*\*p < 0.001 via the t-test.

(B) Occupancy of different bacterial lawns by wild-type N2 animals grown on *nol-6* as well as RNAi control bacteria at 2 hours after transfer to the lawns. EV, empty vector RNAi control. \*\*p < 0.01 via the t-test. n.s., non-significant.

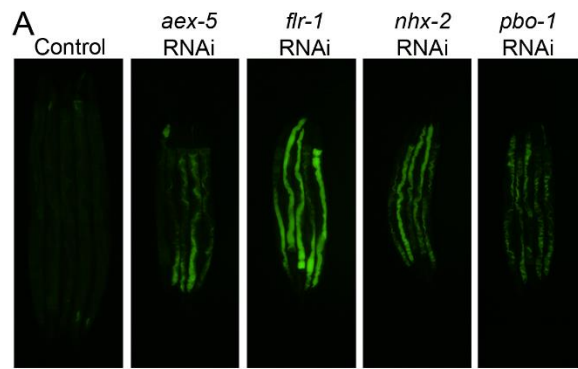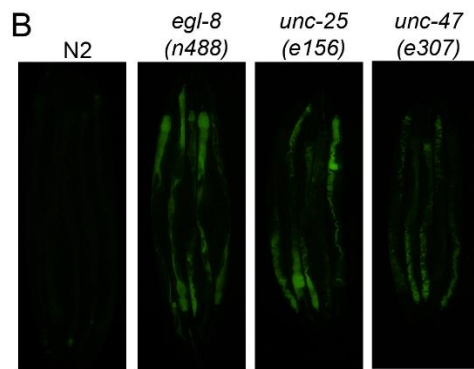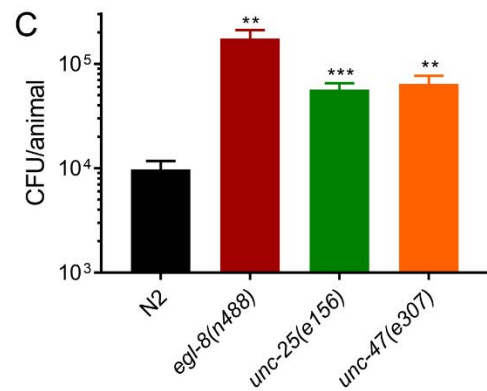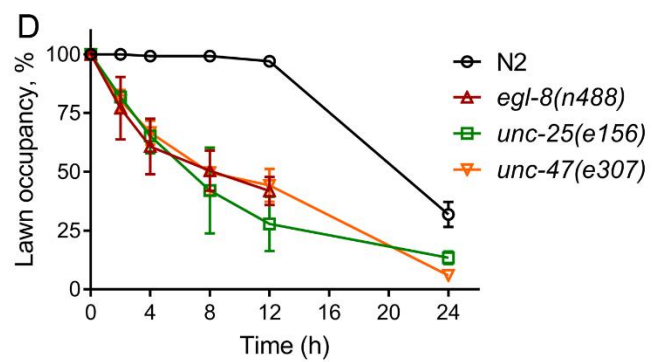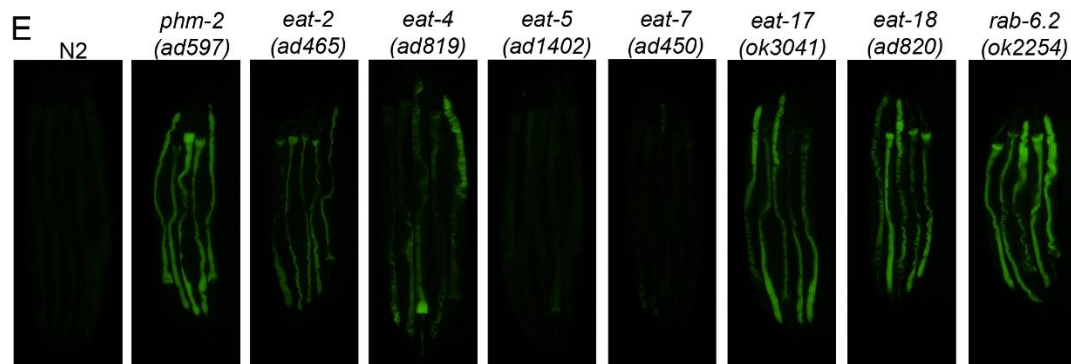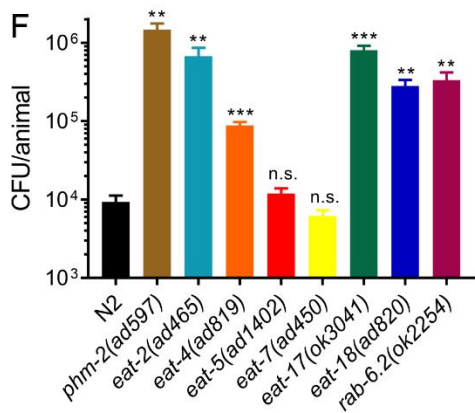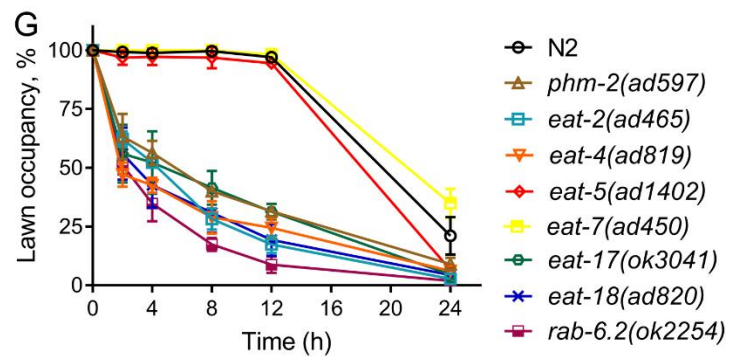

**Figure S2. *P. aeruginosa* Colonization of the Intestine Induces Pathogen Avoidance, Related to Figure 3**

(A) Representative photomicrographs of animals incubated on *P. aeruginosa*-GFP for 5 hours after growth on RNAi bacteria.

(B) Representative photomicrographs of young hermaphroditic adult N2, *egl-8(n488)*, *unc-25(e156)*, and *unc-47(e307)* animals incubated on *P. aeruginosa*-GFP for 5 hours at 25°C.

(C) Colony forming units per animal for young hermaphroditic adult N2, *egl-8(n488)*, *unc-25(e156)*, and *unc-47(e307)* animals exposed to *P. aeruginosa*-GFP for 5 hours at 25°C. \*\*\*p < 0.001, and \*\*p < 0.01 via the t-test.

(D) Percent occupancy of *P. aeruginosa* lawns over time by N2, *egl-8(n488)*, *unc-25(e156)*, and *unc-47(e307)* animals.

(E) Representative photomicrographs of young hermaphroditic adult N2, *phm-2(ad597)*, *eat-2(ad465)*, *eat-4(ad819)*, *eat-5(ad1402)*, *eat-7(ad450)*, *eat-17(ok3041)*, *eat-18(ad820)*, and *rab-6.2(ok2254)* animals incubated on *P. aeruginosa*-GFP for 5 hours at 25°C.

(F) Colony forming units per animal for young hermaphroditic adult N2, *phm-2(ad597)*, *eat-2(ad465)*, *eat-4(ad819)*, *eat-5(ad1402)*, *eat-7(ad450)*, *eat-17(ok3041)*, *eat-18(ad820)*, and *rab-6.2(ok2254)* animals exposed to *P. aeruginosa*-GFP for 5 hours at 25°C. \*\*\*p < 0.001, and \*\*p < 0.01 via the t-test. n.s., non-significant.

(G) Percent occupancy of *P. aeruginosa* lawns over time by N2, *phm-2(ad597)*, *eat-2(ad465)*, *eat-4(ad819)*, *eat-5(ad1402)*, *eat-7(ad450)*, *eat-17(ok3041)*, *eat-18(ad820)*, and *rab-6.2(ok2254)* animals.

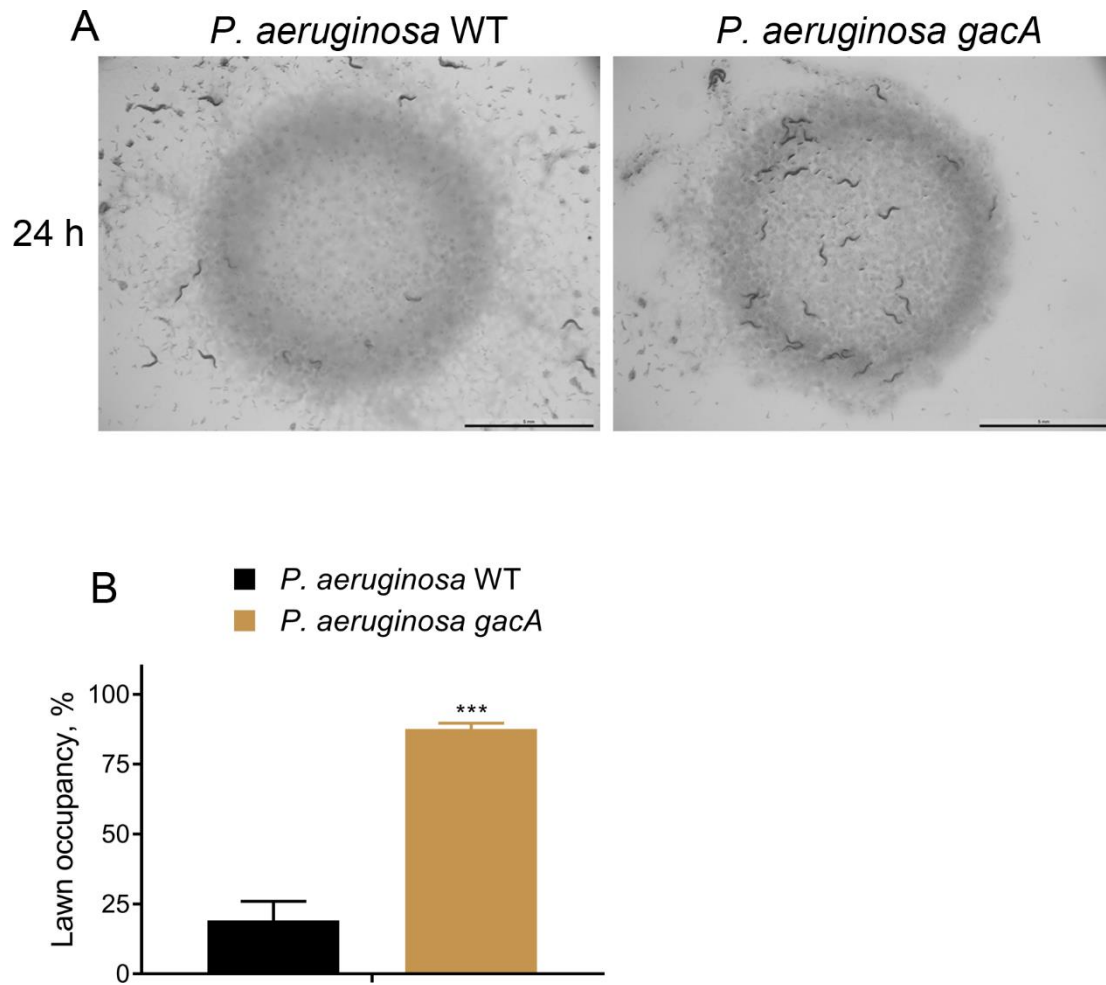

**Figure S3. Avoidance Behavior of N2 animals on Different *P. aeruginosa* Variants, Related to Figure 3**

(A) Representative photomicrographs of N2 animals on *P. aeruginosa* WT and *P. aeruginosa gacA* mutant after 24 hours of incubation.

(B) Percent occupancy of N2 animals on *P. aeruginosa* WT and the *P. aeruginosa gacA* mutant after 24 hours of incubation. \*\*\* $p < 0.001$  via the t-test.

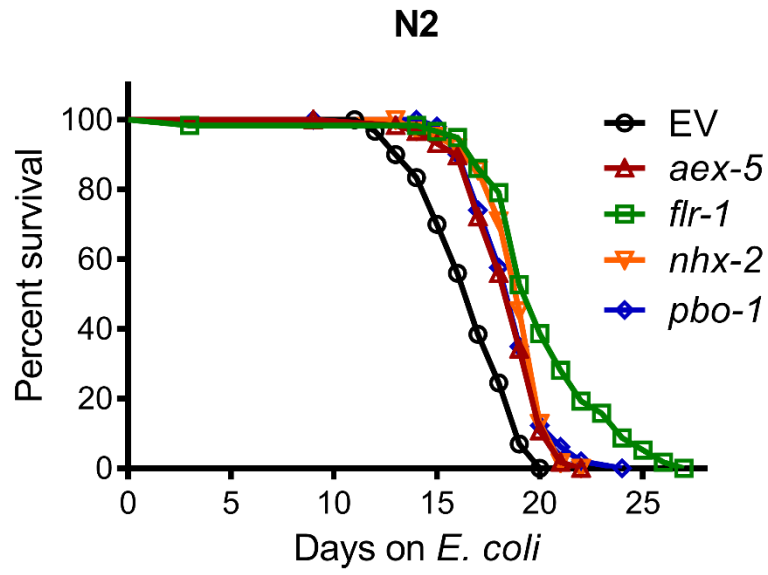

**Figure S4. Intestinal Lumen Bloating Leads to an Increased Lifespan, Related to Figure 4**  
 Survival of N2 animals grown on bacteria for RNAi against *aex-5*, *flr-1*, *nhx-2*, and *pbo-1* along with the empty vector control at 20°C. Day 0 represents young adults. The p values for *aex-5*, *flr-1*, *nhx-2*, and *pbo-1* RNAi relative to the values for the empty vector, EV control are \*\*\*p < 0.0001.

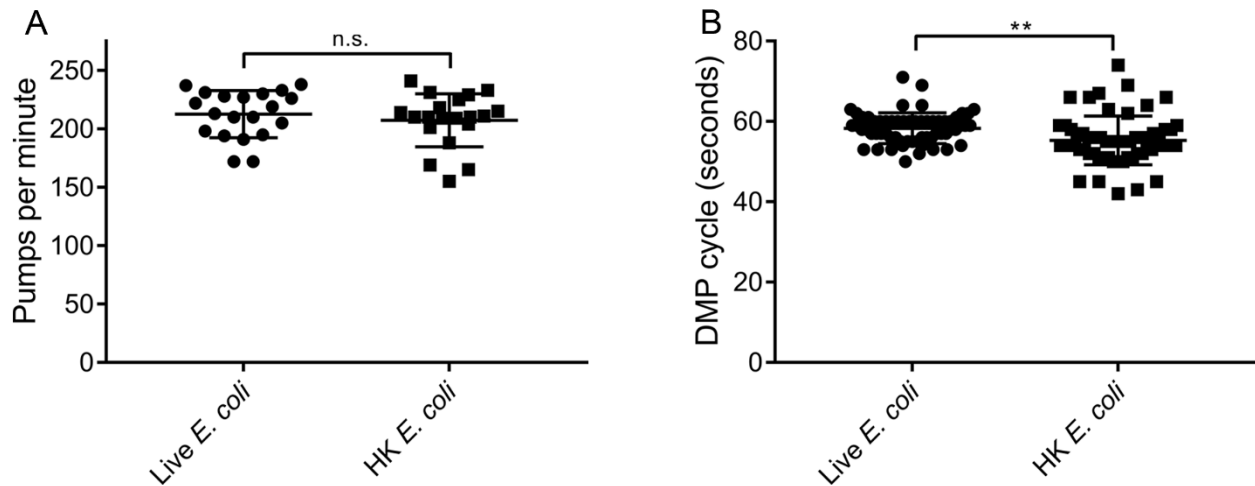

**Figure S5. Pharyngeal Pumping Rate and DMP Cycle Length of Animals Fed Heat-Killed *E. coli*, Related to Figure 4**

(A) Pharyngeal pumps per minute of N2 animals incubated on heat-killed (HK) *E. coli* for 24 hours at 20°C. The animals were grown on live *E. coli* until the young adult stage before incubation on HK *E. coli*. The control animals were maintained on live *E. coli*. n.s., non-significant.

(B) The DMP cycle length of N2 animals incubated on HK *E. coli* for 24 hours at 20 °C. The animals were grown on live *E. coli* until the young adult stage before incubation on HK *E. coli*. The control animals were maintained on live *E. coli*. \*\* $p < 0.01$  via the t-test.

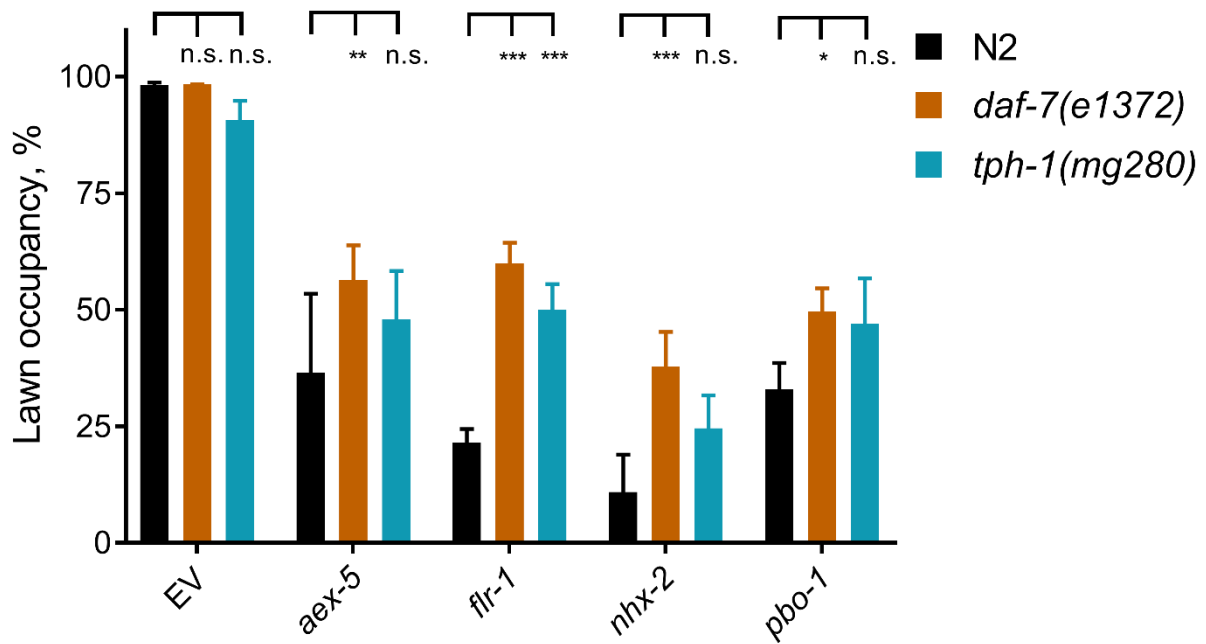

**Figure S6. Role of the DAF-7 and TPH-1 Neural Pathways in Pathogen Avoidance Induced by Intestinal Bloating, Related to Figure 6**

Percent lawn occupancy after 12 hours on *P. aeruginosa* of N2, *daf-7(e1372)*, and *tph-1(mg280)* animals. \*\*\* $p < 0.001$ , \*\* $p < 0.01$ , and \* $p < 0.05$ . n.s., non-significant.



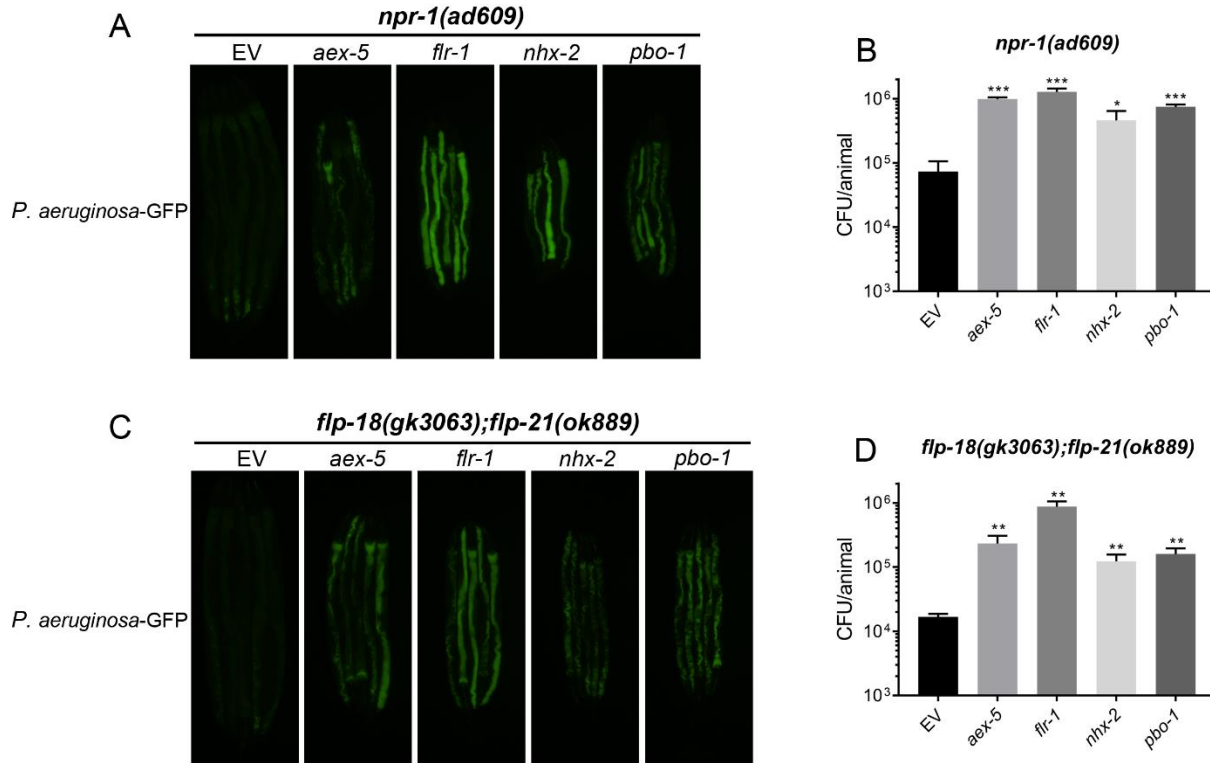

**Figure S7. DMP Gene Knockdown Leads to Enhanced *P. aeruginosa* Colonization in *npr-1(ad609)* and *flp-18(gk3063);flp-21(ok889)* Animals, Related to Figure 6**

(A) Representative photomicrographs of *npr-1(ad609)* animals exposed to *P. aeruginosa*-GFP for 5 hours at 25°C after growth on RNAi bacteria.

(B) Colony forming units per animal for *npr-1(ad609)* animals exposed to *P. aeruginosa*-GFP for 5 hours at 25°C after growth on RNAi bacteria. \*\*\* $p < 0.001$ , and \* $p < 0.05$  via the t-test.

(C) Representative photomicrographs of *flp-18(gk3063);flp-21(ok889)* animals exposed to *P. aeruginosa*-GFP for 5 hours at 25°C after growth on RNAi bacteria.

(D) Colony forming units per animal for *flp-18(gk3063);flp-21(ok889)* animals exposed to *P. aeruginosa*-GFP for 5 hours at 25°C after growth on RNAi bacteria. \*\* $p < 0.01$  via the t-test.

**Table S1. Primer used in the study, Related to Figures 4 and 5**

| <b>Primer for quantitative reverse transcription-PCR</b> |                                   |                                     |
|----------------------------------------------------------|-----------------------------------|-------------------------------------|
| Gene name                                                | Forward primer sequence (5'-3')   | Reverse primer sequence (5'-3')     |
| <i>Pan-act</i>                                           | TCGGTATGGGACAGAAGGAC              | CATCCCAGTTGGTGACGATA                |
| <i>clec-60</i>                                           | CTGCAGTCTGGATGGCAGAA              | CGCAAGATGCCGTTTCACAA                |
| <i>cpr-2</i>                                             | ATCAAAGGGAGGACACGCTG              | AAGAGTTGACAGCGAGCCAA                |
| <i>F53A9.8</i>                                           | CAAGAACACGGACACGGAGA              | ATGTTGGGTGTTCGCAGTGAT               |
| <i>ilys-3</i>                                            | AAGAGGTGCGCGAATGATCT              | CCTGTCCAGTTCAGCACAT                 |
| <i>lys-4</i>                                             | CTAGAGCAGCTGGCCTCAC               | GCAGCAGATGGGCAGTTAGA                |
| <i>lys-5</i>                                             | GCTCCATTCGGAGGATGGTC              | GACTCCACACGGACCAGTAG                |
| <i>ugt-18</i>                                            | GGGTTGGGCAGTACAATGGA              | ACTGAAGACATCCTCCGTGC                |
| <i>daf-7</i>                                             | GGGTGCTGCTTGTATGACCT              | CCAAGTTGAAGTGGTGTGCG                |
| <i>flp-18</i>                                            | GTTCGACAAGCGCAGTGAAG              | CCCTGCGTAATGCTCTTCCA                |
| <i>flp-21</i>                                            | GCGGCTGTTTCATCTTGCTTT             | TAAACTCTGTCACTGCCGGG                |
| <i>npr-1</i>                                             | ACTCTATGCGTGGCTGAACC              | TCACTTTTACGCCGGTCTCC                |
| <i>tph-1</i>                                             | TCAGATGGCATCCGCAATGA              | CCACTTCGACGAAAACGACG                |
| <b>Primer for construction of RNAi clone</b>             |                                   |                                     |
| Gene name                                                | Forward primer sequence (5'-3')   | Reverse primer sequence (5'-3')     |
| <i>pbo-1</i>                                             | GCTCCCGGGATGGGCCAAAAT<br>TCGTCTCA | AGGTCTAGATGTCAAAAAACGGAA<br>GGACATC |
